# Supplementary material for: Endogenous levels of cytokinins, indole-3-acetic acid and abscisic acid in in vitro grown potato: A contribution to potato hormonomics
Source: PubMed Central journal article supplement (PMC7044434; doi:10.1038/s41598-020-60412-9), 2020-02-26
Supplement: 41598_2020_60412_MOESM1_ESM.pdf [file 41598_2020_60412_MOESM1_ESM.pdf]

**Endogenous levels of cytokinins, indole-3-acetic acid and abscisic acid in in vitro grown potato: A contribution to potato hormonomics**

Martin Raspor, Václav Motyka, Slavica Ninković, Petre I. Dobrev, Jiří Malbeck, Tatjana Čosić, Aleksandar Čingel, Jelena Savić, Vojin Tadić, Ivana Č. Dragičević

**Supplementary Information**

**Supplementary Table S1.** [<sup>2</sup>H]-labelled compounds used as internal standards for cytokinin quantification. For the determination of ribonucleotides, deuterated ribonucleotides (*tZRMP*, *DHZRMP* and *iPRMP*) were added as internal standards prior to sample purification and dephosphorylation. *cZ* – *cis*-zeatin; *tZ* – *trans*-zeatin; *DHZ* – dihydrozeatin; *iP* – *N*<sup>6</sup>-( $\Delta^2$ -isopentenyl)adenine; *cZR* – *cis*-zeatin 9-riboside; *tZR* – *trans*-zeatin 9-riboside; *DHZR* – dihydrozeatin 9-riboside; *iPR* – *N*<sup>6</sup>-( $\Delta^2$ -isopentenyl)adenine 9-riboside; *cZOG* – *cis*-zeatin *O*-glucoside; *tZOG* – *trans*-zeatin *O*-glucoside; *DHZOG* – dihydrozeatin *O*-glucoside; *cZROG* – *cis*-zeatin 9-riboside *O*-glucoside; *tZROG* – *trans*-zeatin 9-riboside *O*-glucoside; *DHZROG* – dihydrozeatin 9-riboside *O*-glucoside; *cZ7G* – *cis*-zeatin 7-glucoside; *tZ7G* – *trans*-zeatin 7-glucoside; *DHZ7G* – dihydrozeatin 7-glucoside; *iP7G* – *N*<sup>6</sup>-( $\Delta^2$ -isopentenyl)adenine 7-glucoside; *cZ9G* – *cis*-zeatin 9-glucoside; *tZ9G* – *trans*-zeatin 9-glucoside; *DHZ9G* – dihydrozeatin 9-glucoside; *iP9G* – *N*<sup>6</sup>-( $\Delta^2$ -isopentenyl)adenine 9-glucoside. The system of cytokinin abbreviations is adopted and modified according to Kamínek et al. (2000)<sup>6</sup>.

| Deuterated compounds        | Used as internal standard for     |
|-----------------------------|-----------------------------------|
| <i>tZ7G-D</i> <sub>5</sub>  | <i>tZ7G</i> , <i>cZ7G</i>         |
| <i>tZ9G-D</i> <sub>5</sub>  | <i>tZ9G</i> , <i>DHZ7G</i> (1,2)* |
| <i>tZOG-D</i> <sub>5</sub>  | <i>tZOG</i> , <i>cZOG</i>         |
| <i>DHZ9G-D</i> <sub>3</sub> | <i>DHZ9G</i> , <i>cZ9G</i>        |
| <i>DHZOG-D</i> <sub>7</sub> | <i>DHZOG</i>                      |
| <i>tZROG-D</i> <sub>5</sub> | <i>tZROG</i> , <i>cZROG</i>       |
| <i>tZ-D</i> <sub>5</sub>    | <i>tZ</i>                         |
| <i>DHZ-D</i> <sub>3</sub>   | <i>DHZ</i> , <i>cZ</i>            |
| <i>tZR-D</i> <sub>5</sub>   | <i>tZR</i> , <i>DHZROG</i>        |
| <i>DHZR-D</i> <sub>3</sub>  | <i>DHZR</i> , <i>cZR</i>          |
| <i>iP7G-D</i> <sub>6</sub>  | <i>iP7G</i>                       |
| <i>iP9G-D</i> <sub>6</sub>  | <i>iP9G</i>                       |
| <i>iPR-D</i> <sub>6</sub>   | <i>iPR</i>                        |
| <i>iP-D</i> <sub>6</sub>    | <i>iP</i>                         |

\**DHZ7G* represents a mixture of two optical isomers separated by HPLC.
